# Supplementary material for: Seed-assisted, solvent-free synthesis of a CHA-type aluminophosphate molecular sieve
Source: Royal Society of Chemistry journal article supplement (doi:10.1039/c5ra18148h), 2015-01-01
Supplement: c5ra18148h1.pdf [file c5ra18148h1.pdf]

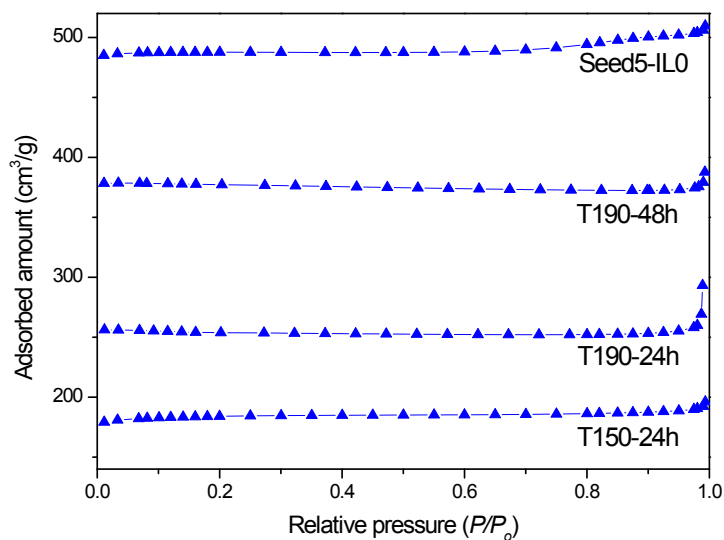

Fig. S1 N<sub>2</sub> adsorption isotherms of the calcined samples T150-24h, T190-24h, T190-48h and Seed5-IL0 (The isotherms for T190-24h, T190-48h and Seed5-IL0 were offset vertically by 100, 200 and 300 cm<sup>3</sup>/g).
